# Supplementary material
Source: HighWire-hosted journal article supplement (https://www.annfammed.org/highwire/filestream/14340/field_highwire_adjunct_files/0/Ha.pdf)

**Supplemental materials for**

Ha E, Chen Yu G, Harrison B. Addressing COVID-19 immunization disparities through targeted primary care outreach. *Ann Fam Med.* 2022;20(1):90.

**Figure 1.** Results of targeted outreach workflow for a provider’s patient panel.

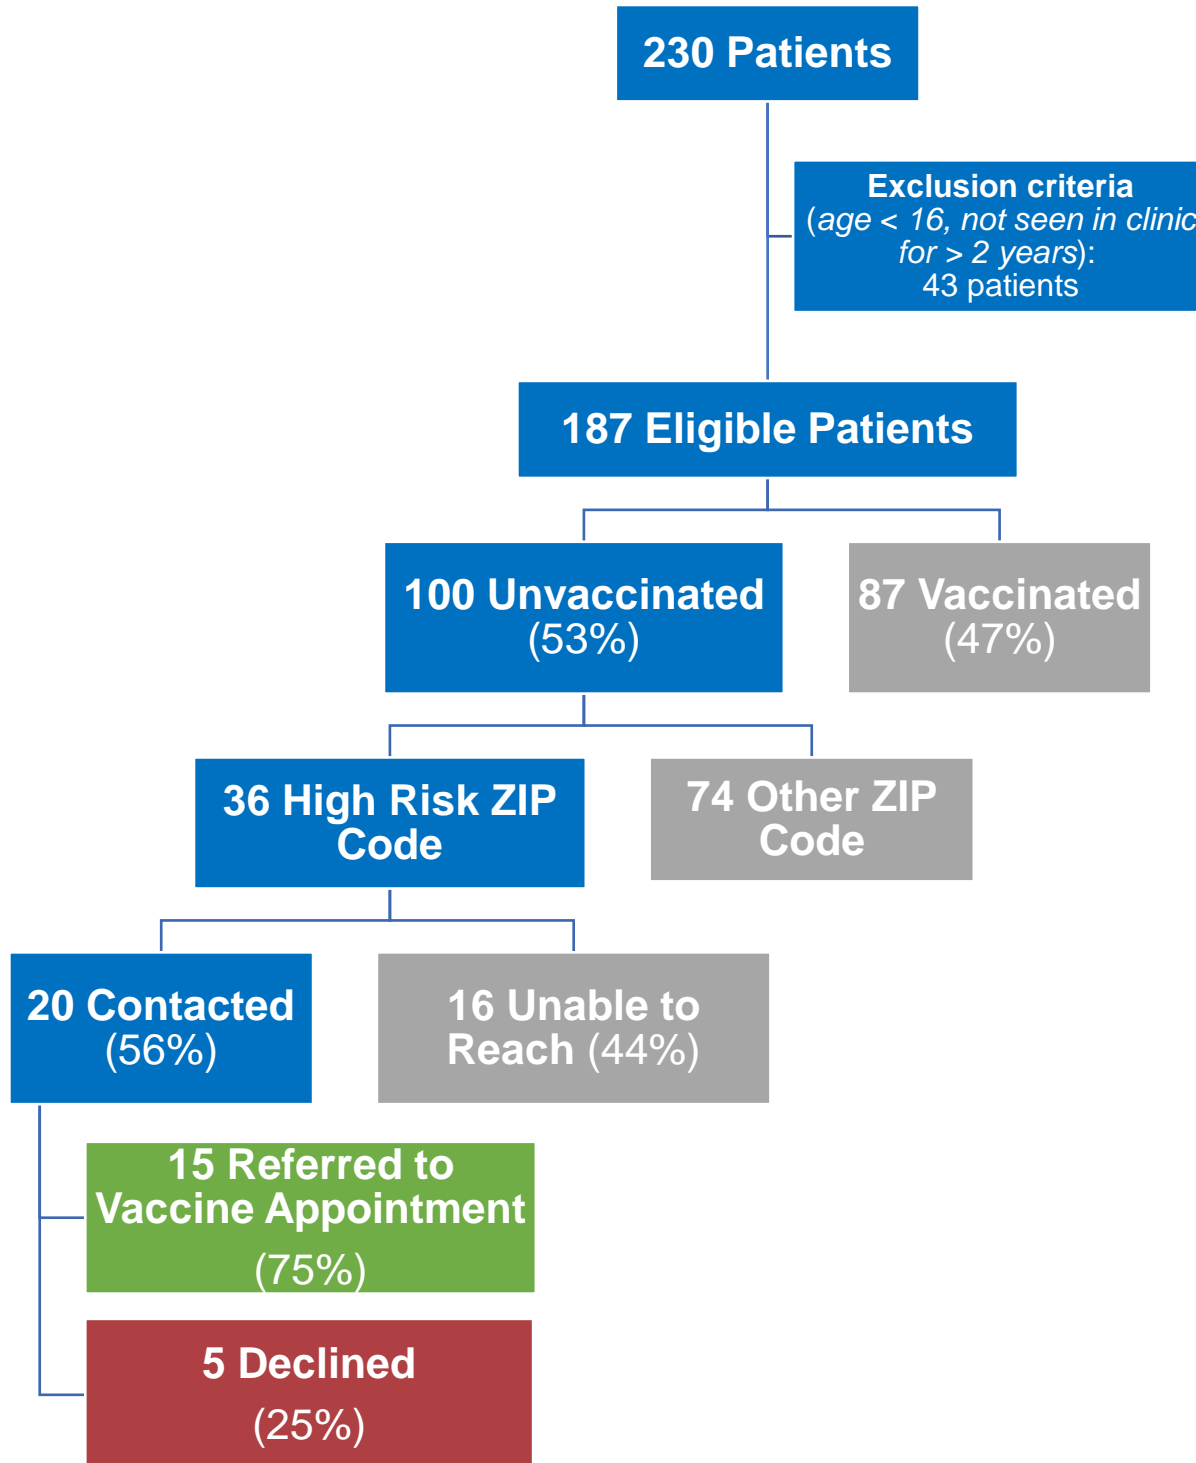

Supplement: Ha.pdf [file Ha.pdf]
